# Supplementary material
Source: Springer Nature journal article supplement (https://www.springermedizin.de/resource/supplementary/12936_2014_3176_MOESM7_ESM.pdf/9545226)

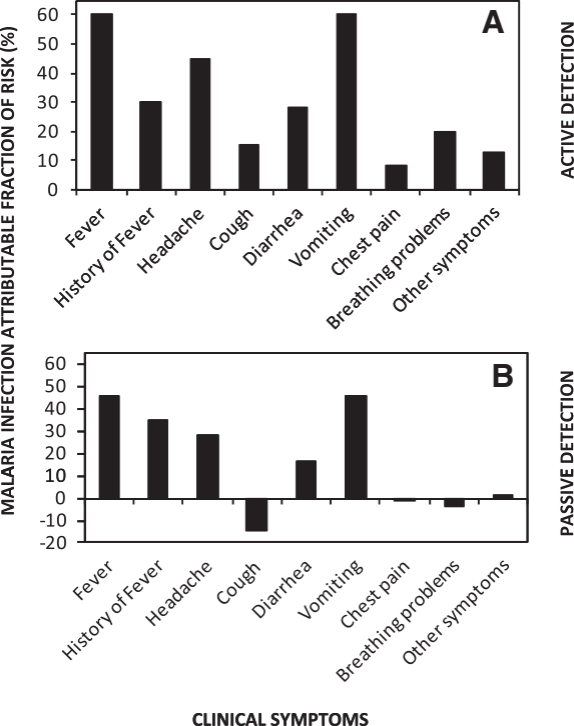

Supplement: MOESM7 [file 9545226]
